# Supplementary material for: Selective catalytic reduction over Cu-exchanged X zeolite catalyst: in situ DRIFTS and DFT studies of NH3-SCR mechanism
Source: Royal Society of Chemistry journal article supplement (doi:10.1039/d3nj04242a), 2023-01-01
Supplement: d3nj04242a1.pdf [file d3nj04242a1.pdf]

1  
2  
3  
4  
5  
6  
7  
8  
9  
10  
11  
12  
13  
14  
15  
16  
17  
18  
19  
20  
21  
22  
23  
24

# Supporting Information

## Selective Catalytic Reduction over Cu-exchanged X zeolite catalyst:

### In situ DRIFTS and DFT studies of NH<sub>3</sub>-SCR mechanism

Hongli Wu <sup>a,b</sup>, Lu Yao <sup>c</sup>, Chunlian Ding <sup>a,\*</sup>, Xiaoyong Jiang <sup>a</sup>, Weizao Liu <sup>a,\*</sup>

<sup>a</sup> College of Materials Science and Engineering, Chongqing University, Chongqing 400044,

PR China

<sup>b</sup> College of Environment and Ecology, Chongqing University, Chongqing 400044, PR China

<sup>c</sup> School of Science, Chongqing University of Posts and Telecommunications, Chongqing

400065, China

\*Corresponding author. liuwz@cqu.edu.cn (W. Liu) liu\_qingcai@163.com (Q.Liu)

25

26

27 **Text S1: preparation procedure**

28 Zeolite X was prepared from blast furnace slag by hydrothermal reaction as  
29 described in our previous study.<sup>1</sup> The Cu-exchanged zeolite was prepared by  
30 impregnation method. In detail, a certain amount (2.95-11.82 g) of  $\text{Cu}(\text{NO}_3)_2 \cdot 6 \text{H}_2\text{O}$   
31 was dissolved in 100 mL deionized water. Then 2 g zeolite X was impregnated in the  
32 precursor solution at 50 °C for 3 h. The sample was dried at 110 °C for 12 h, and  
33 calcined at 450 °C for 3 h. The obtained catalyst was denoted as  $\gamma$ -Cu-X (Different Cu  
34 content ion exchange X zeolite), where  $\gamma$  represented the Cu/Al mass ratios (wt.%).  
35 The  $\gamma$  value was calculated by ICP.

36 **Text S2: Catalytic activity test conditions**

37 The catalytic performance of Cu-X catalyst with different Cu exchanged  
38 amounts was investigated by measuring the NO conversion. SCR performance  
39 measurements were conducted with 0.3 g (40-60 mesh) catalyst under the following  
40 reactant gas conditions: 1000 ppm NO, 1000 ppm  $\text{NH}_3$ , 11%  $\text{O}_2$  with  $\text{N}_2$  as balance  
41 gas at a total flow rate of 200 mL/min and GHSV 40000  $\text{h}^{-1}$ . The concentrations of  
42  $\text{NH}_3$ , NO,  $\text{NO}_2$  and  $\text{SO}_2$  in flue gas were measured by Thermo Scientific, Antaris IGS  
43 flue gas analyzer. The NO conversion and  $\text{N}_2$  selectivity were calculated as follows:

44 
$$\text{NO conversion}(\%) = \left( 1 - \frac{[\text{NO}]_{out}}{[\text{NO}]_{in}} \right) \quad (\text{S1})$$

45 
$$\text{N}_2 \text{ selectivity}(\%) = \left( 1 - \frac{[\text{NO}_2] + 2[\text{N}_2\text{O}]_{out}}{[\text{NO}]_{in} + [\text{NH}_3]_{in} - [\text{NO}]_{out} - [\text{NH}_3]_{out}} \right)$$
  
46 
$$(\text{S2})$$

47 where  $[\text{NO}]_{\text{in}}$  and  $[\text{NO}]_{\text{out}}$  represent the inlet and outlet concentration of NO.  
48  $[\text{NO}_2]_{\text{out}}$  and  $[\text{N}_2\text{O}]_{\text{out}}$  stand for the outlet concentration of  $\text{NO}_2$  and  $\text{N}_2\text{O}$ , respectively.

#### 49 **Text S3: Catalytic characterization**

50 Rigaku D/max-2500 PC diffractometer was used to record X-ray diffractometer  
51 (XRD) patterns with  $\text{Cu-K}\alpha$  radiation operating at 40 kV and 40 mA over a  $2\theta$  range  
52 of  $5\text{-}80^\circ$  with  $0.02^\circ$  interval at a scanning rate of  $10^\circ/\text{min}$ .

53 The specific surface area and average pore size of the catalysts were measured  
54 on the American Micromeritics ASAP2020 surface area analyzer. The specific  
55 surface areas were determined by the Brunauer-Emmett-Teller (BET) method by  
56 nitrogen adsorption at 77 K.

57 The morphology and microstructure of the prepared specimens were examined  
58 by scanning electron microscopy (SEM, ZEISS Sigma 300) at an accelerating voltage  
59 of 15 kV.

60  $\text{NH}_3$  temperature-programmed desorption ( $\text{NH}_3$ -TPD) and NO temperature-  
61 programmed desorption (NO-TPD) was performed on the SCR reactor system to test  
62 adsorption capacity of catalysts. In detail, 0.3 g sample was firstly saturated with  
63 adsorption in  $30^\circ\text{C}$ , and the purged with nitrogen followed by temperature  
64 programmed to  $600^\circ\text{C}$  in 57 minutes. The concentration of desorbed gases can be  
65 determined by the flue gas analyzer.

66 In situ diffuse reflectance infrared Fourier transform spectra (in situ DRIFTS)  
67 were collected from  $1000$  to  $4000\text{ cm}^{-1}$  with scanning numbers of 64 times at a  
68 spectral resolution of  $8\text{ cm}^{-1}$  on a Nicolet iS50 FTIR spectrometer. The samples were  
69 firstly pretreated at  $300^\circ\text{C}$  for 1 h in  $\text{N}_2$  flow and cooled to each target temperature.  
70 Then the background spectrum was collected during the cooling process and  
71 automatically subtracted from the sample spectrum.

72 The computation works were completed by Density functional theory (DFT) as  
 73 implemented modeling CASTEP in Material Studio 2020 (Accelrys, USA). The  
 74 chemical model was provided by the standard FAU model derived from the Material  
 75 Studio (MS) package, which was selected to describe the structural units of X zeolite.  
 76 The Cu-X original model for SCR reaction mechanism was the X zeolite (1 1 1) with  
 77 78 atoms loaded on a Cu atom. A vacuum layer of 15 Å in the vertical direction was  
 78 used to minimize the interaction between neighboring slab surfaces. Geometry  
 79 Optimization was conducted with GGA-PBE as the exchange-correlation function.  
 80 The SCF tolerance was set  $2.0 \times 10^{-6}$  eV and the max SCF cycle was 150. The  
 81 adsorption energy,  $E_{ads}$  (eV) was defined by the following Eq. (S1), where  
 82  $E_{adsorbate/surface}$ ,  $E_{adsorbate}$  and  $E_{surface}$  are the total energies of the surface  
 83 with the adsorbate present, the corresponding free adsorbate gas and the free surface,  
 84 respectively.

$$85 \quad E_{ads} = E_{adsorbate/surface} - E_{adsorbate} - E_{surface} \quad (S1)$$

86

87 **Table S1.** BET surface area and pore parameters of Cu-exchanged zeolite X

| Sample    | BET surface area (m <sup>2</sup> /g) | Pore size (nm) |
|-----------|--------------------------------------|----------------|
| X-zeolite | 721                                  | 1.90           |
| 1.32-Cu-X | 310                                  | 3.33           |
| 1.41-Cu-X | 224                                  | 3.70           |
| 1.50-Cu-X | 115                                  | 4.83           |
| 1.76-Cu-X | 97                                   | 4.19           |

88

89 **Table S2.** Energy change of NH<sub>3</sub>-SCR reaction.

| Sample | Cu <sup>n+</sup> | Cu <sup>n+</sup> -NH <sub>3</sub> | Cu <sup>(n-1)+</sup> -<br>NH <sub>2</sub> +H <sup>+</sup> | Cu <sup>(n-1)+</sup> -<br>NH <sub>2</sub> +NH <sub>4</sub> <sup>+</sup> | Cu <sup>(n-1)+</sup> -<br>NH <sub>2</sub> NO+NH <sub>4</sub> <sup>+</sup> | Cu <sup>(n-)</sup> -<br>NO+NH <sub>4</sub> <sup>+</sup> | Cu <sup>(n-1)+</sup> -<br>NO+NH <sub>4</sub> <sup>+</sup> | Cu <sup>n+</sup> -NO <sub>3</sub> <sup>-</sup> -<br>+NH <sub>4</sub> <sup>+</sup> | Cu <sup>n+</sup> -NO <sub>2</sub> <sup>-</sup> -<br>+NH <sub>4</sub> <sup>+</sup> | Cu <sup>n+</sup> |
|--------|------------------|-----------------------------------|-----------------------------------------------------------|-------------------------------------------------------------------------|---------------------------------------------------------------------------|---------------------------------------------------------|-----------------------------------------------------------|-----------------------------------------------------------------------------------|-----------------------------------------------------------------------------------|------------------|
|--------|------------------|-----------------------------------|-----------------------------------------------------------|-------------------------------------------------------------------------|---------------------------------------------------------------------------|---------------------------------------------------------|-----------------------------------------------------------|-----------------------------------------------------------------------------------|-----------------------------------------------------------------------------------|------------------|

|                    |   |       |       |       |       |       |       |       |       |       |
|--------------------|---|-------|-------|-------|-------|-------|-------|-------|-------|-------|
| Energy change (eV) | 0 | -1.75 | +0.41 | -1.20 | -0.51 | -1.99 | -0.66 | -1.77 | +0.65 | -2.08 |
| Total energy (eV)  | 0 | -1.75 | -1.34 | -2.54 | -3.05 | -5.04 | -5.70 | -7.47 | -6.75 | -8.83 |

90

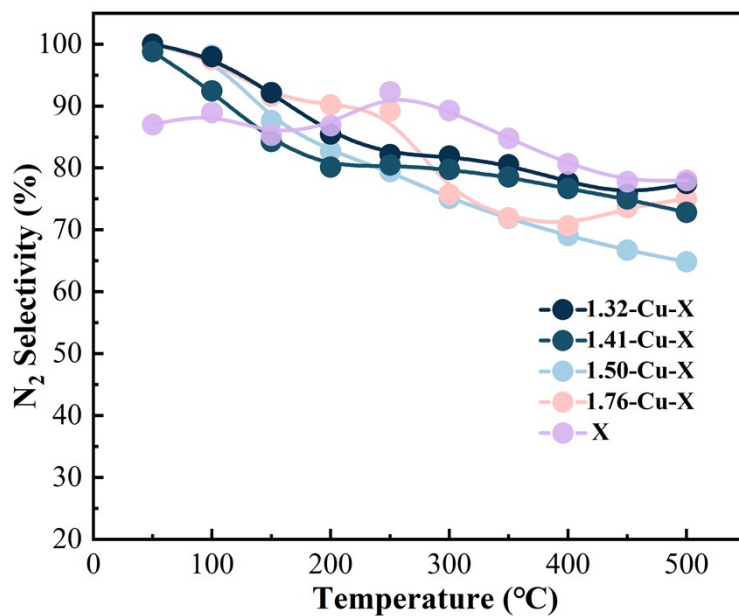

91

92

Fig. S1.  $N_2$  selectivity of catalysts as a function of reaction temperature.

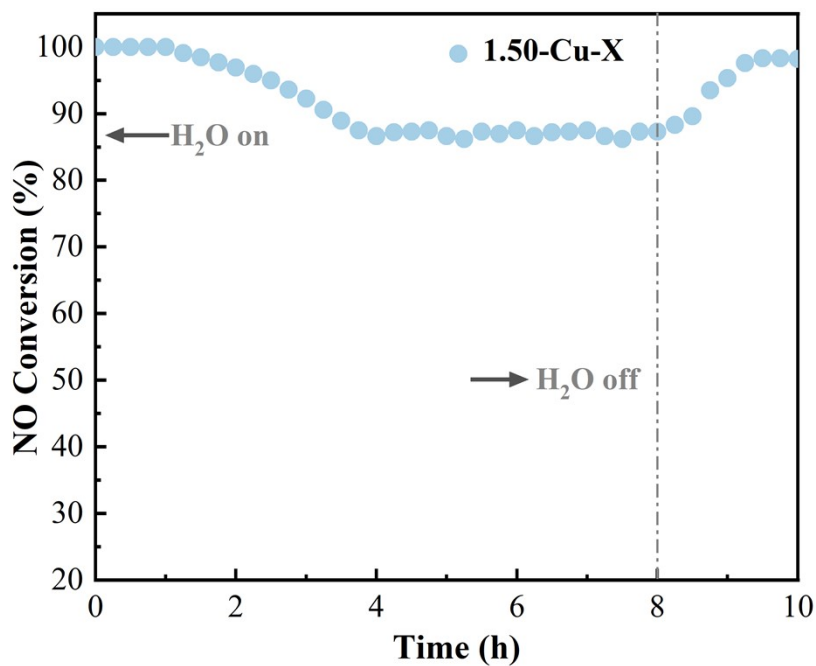

93

94 **Fig. S2.** NO conversion of 1.50-Cu-X catalyst as a function of reaction temperature in the  
95 presence of H<sub>2</sub>O.  
96  
97

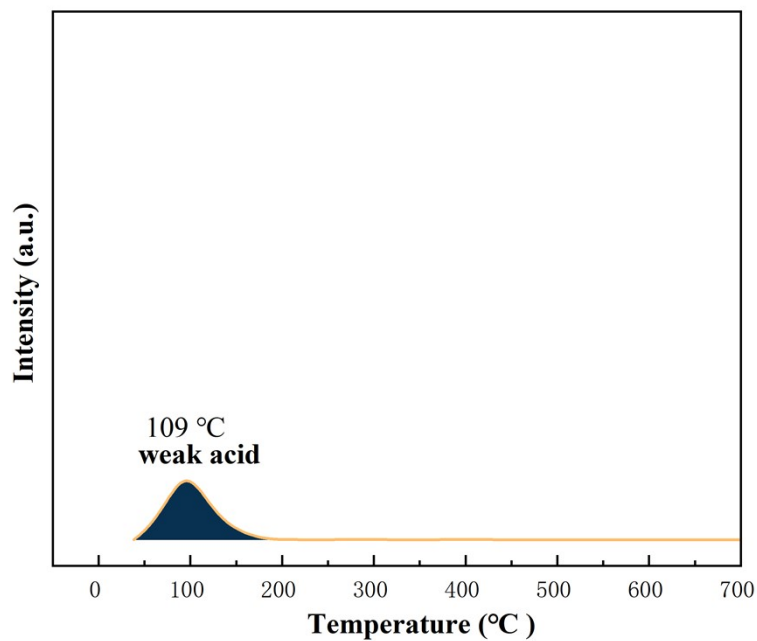

98

99

**Fig. S3.** NH<sub>3</sub>-TPD profile of X zeolite.

100

101

## 102 **Notes and references**

103 1. G. Hu, S. Rohani, X. Jiang, J. Li, Q. Liu and W. Liu, ACS Sustainable Chem.

104 Eng., 2021, **9**, 13963-13971.

105
